# Supplementary material
Source: ML conference proceedings conference paper supplement (https://openreview.net/forum?id=rzjWktciDM)
Supplement: supplementary_material [file appendix.pdf › supplement/appendix.pdf]

## Appendix

### A Notation Table

We provide the important notations and their descriptions for clarification on Table.3.

| Symbol                                         | Description                                                                                                      |
|------------------------------------------------|------------------------------------------------------------------------------------------------------------------|
| $\mathbf{X} \in \mathbb{R}^{M \times D}$       | Source domain data matrix                                                                                        |
| $\mathbf{Z} \in \mathbb{R}^{N \times D}$       | Target domain data matrix                                                                                        |
| $M$                                            | Number of source samples                                                                                         |
| $N$                                            | Number of target samples                                                                                         |
| $D$                                            | Data dimension                                                                                                   |
| $\mathbf{a} \in \mathbb{R}^M$                  | Source marginal probability vector                                                                               |
| $\mathbf{b} \in \mathbb{R}^N$                  | Target marginal probability vector                                                                               |
| $\boldsymbol{\pi} \in \mathbb{R}^{M \times N}$ | Coupling matching matrix (transport plan)                                                                        |
| $\mathbf{C} \in \mathbb{R}^{M \times N}$       | Cost (distance) matrix                                                                                           |
| $\tau$                                         | KL divergence coefficient for SemiUOT                                                                            |
| $\tau_a$                                       | KL divergence coefficient for source (UOT)                                                                       |
| $\tau_b$                                       | KL divergence coefficient for target (UOT)                                                                       |
| $\boldsymbol{\alpha}$                          | Adjusted source marginal (via ETM)                                                                               |
| $\boldsymbol{\beta}$                           | Adjusted target marginal (via ETM)                                                                               |
| $\mathbf{f}$                                   | Dual variable (SemiUOT, source)                                                                                  |
| $\mathbf{g}$                                   | Dual variable (SemiUOT, target)                                                                                  |
| $\mathbf{u}$                                   | Dual variable (UOT, source)                                                                                      |
| $\mathbf{v}$                                   | Dual variable (UOT, target)                                                                                      |
| $\zeta$                                        | Scalar dual variable (shared)                                                                                    |
| $\mathbf{s}$                                   | KKT multiplier variable                                                                                          |
| $\omega$                                       | Scaling factor: $\omega = \frac{\langle \mathbf{b}, \mathbf{1} \rangle}{\langle \mathbf{a}, \mathbf{1} \rangle}$ |
| $\epsilon$                                     | LogSumExp smoothing parameter                                                                                    |
| $\nu$                                          | Update step: $\nu = \frac{\tau \epsilon}{\tau + \epsilon}$                                                       |
| $J_{\text{SemiUOT}}$                           | Objective function of SemiUOT                                                                                    |
| $J_{\text{UOT}}$                               | Objective function of UOT                                                                                        |
| $L_P$                                          | Exact SemiUOT Equation                                                                                           |
| $\hat{L}_P$                                    | Approximate SemiUOT Equation                                                                                     |
| $L_U$                                          | Exact UOT Equation                                                                                               |
| $\hat{L}_U$                                    | Approximate UOT Equation                                                                                         |
| $G(\boldsymbol{\pi}, \mathbf{s})$              | KKT-multiplier regularization term: $\langle \boldsymbol{\pi}, \mathbf{s} \rangle$                               |
| $L_{\text{Reg}}(\boldsymbol{\pi})$             | Regularization term for OT (e.g. entropy or $\ell_2$ )                                                           |
| $\eta_G$                                       | Regularization weight for multiplier term                                                                        |
| $\eta_{\text{Reg}}$                            | Regularization weight (entropy or $\ell_2$ )                                                                     |
| $\tilde{C}_{ij}$                               | Adjusted cost: $\tilde{C}_{ij} = C_{ij} + \eta_G s_{ij}$                                                         |
| $\boldsymbol{\psi}$                            | Dual variable in MROT (source side)                                                                              |
| $\boldsymbol{\phi}$                            | Dual variable in MROT (target side)                                                                              |

Table 3: Important notations

### B Proof of Proposition 1

**Proposition 1.** (Principles of Equivalent Transformation Mechanism for SemiUOT) *Given SemiUOT with KL-Divergence  $J_{\text{SemiUOT}}$ , one can obtain its Fenchel-Lagrange multipliers form as:*

$$\begin{aligned}
 \min_{\mathbf{f}, \mathbf{g}, \zeta} & \left[ \tau \sum_{i=1}^M a_i \exp \left( -\frac{f_i + \zeta}{\tau} \right) - \sum_{j=1}^N b_j (g_j - \zeta) \right] \\
 \text{s.t. } & f_i + g_j + s_{ij} = C_{ij}, \quad s_{ij} \geq 0.
 \end{aligned} \tag{16}$$

955 where  $\mathbf{f}$ ,  $\mathbf{g}$ ,  $\mathbf{s}$  and  $\zeta$  denote Lagrange multipliers. Moreover, SemiUOT problem can be further  
 956 transformed into the form of classic optimal transport as follows:

$$\begin{aligned} \min_{\pi \geq 0} \mathcal{J}_P &= \langle \mathbf{C}, \pi \rangle \\ \text{s.t.} \quad &\begin{cases} \pi \mathbf{1}_N = \mathbf{a} \odot \exp\left(-\frac{\mathbf{f}^* + \zeta^*}{\tau}\right) = \boldsymbol{\alpha} \\ \pi^\top \mathbf{1}_M = \mathbf{b} \end{cases} \end{aligned} \quad (17)$$

957 When  $\tau \rightarrow \infty$ , the source marginal probability is given as  $\pi \mathbf{1}_N = \omega \mathbf{a}$  where  $\omega = \langle \mathbf{b}, \mathbf{1}_N \rangle / \langle \mathbf{a}, \mathbf{1}_M \rangle$ .

958 *Proof.* To start with, we first review the definition of SemiUOT as shown below:

$$\begin{aligned} \min_{\pi_{ij} \geq 0} J_{\text{SemiUOT}} &= \langle \mathbf{C}, \pi \rangle + \tau \text{KL}(\pi \mathbf{1}_N \| \mathbf{a}) \\ \text{s.t.} \quad &\pi^\top \mathbf{1}_M = \mathbf{b}. \end{aligned} \quad (18)$$

959 Then we can rewrite the optimization problem:

$$\begin{aligned} \min_{\pi \geq 0} J &= \langle \mathbf{C}, \pi \rangle + \tau \text{KL}(\pi \mathbf{1}_N \| \mathbf{a}) \\ \text{s.t.} \quad &\begin{cases} (\text{Constraint}) : \pi^\top \mathbf{1}_M = \mathbf{b} \\ (\text{Optional}) : \pi \mathbf{1}_N = \boldsymbol{\alpha} \end{cases} \end{aligned} \quad (19)$$

960 Note that we do not need to know the exact value of  $\boldsymbol{\alpha}$  beforehand. We adopt this optional constraint  
 961 only for simplifying the following deduction. The Lagrange multipliers of SemiUOT with KL-  
 962 Divergence is given as:

$$\begin{aligned} \max_{\mathbf{s} \geq 0, \mathbf{f}, \mathbf{g}, \zeta} \min_{\pi \geq 0} \mathcal{J}_{\text{SemiUOT}} &= \tau \text{KL}(\pi \mathbf{1}_N \| \mathbf{a}) + \langle \mathbf{f} + \zeta, \pi \mathbf{1}_N \rangle + \langle \mathbf{g} - \zeta, \mathbf{b} \rangle + \\ &\langle \mathbf{C} - \mathbf{u} \otimes \mathbf{1}_N^\top - \mathbf{1}_M \otimes \mathbf{v}^\top - \mathbf{s}, \pi \rangle, \end{aligned} \quad (20)$$

963 where  $\mathbf{f}$ ,  $\mathbf{g}$ ,  $\mathbf{s}$  and  $\zeta$  are dual variables. By taking the differentiation on  $\pi_{ij}$  we have:

$$\begin{aligned} \frac{\partial \mathcal{J}_{\text{SemiUOT}}}{\partial \pi_{ij}} &= \left[ \tau \log \frac{\sum_{j=1}^N \pi_{ij}}{a_i} + f_i + \zeta \right] + (C_{ij} - f_i - g_j - s_{ij}) \\ &= C_{ij} + \tau \log \frac{\sum_{j=1}^N \pi_{ij}}{a_i} + \zeta - g_j - s_{ij} \\ &= 0. \end{aligned} \quad (21)$$

964 Therefore, we can obtain the results as:

$$\begin{cases} \sum_{j=1}^N \pi_{ij} = a_i \exp\left(-\frac{f_i + \zeta}{\tau}\right) \\ \sum_{i=1}^M \pi_{ij} = b_j \\ C_{ij} - f_i - g_j - s_{ij} = 0 \end{cases} \quad (22)$$

965 After that, we can take these back into KL-Divergence to simplify the calculation:

$$\begin{aligned}
& \tau \text{KL}(\boldsymbol{\pi} \mathbf{1}_N \| \mathbf{a}) + \langle \mathbf{f} + \zeta, \boldsymbol{\pi} \mathbf{1}_N \rangle \\
&= \tau \text{KL} \left( \left\langle \mathbf{a}, \exp \left( -\frac{\mathbf{f} + \zeta}{\tau} \right) \right\rangle \| \mathbf{a} \right) + \left\langle \mathbf{f} + \zeta, \mathbf{a} \exp \left( -\frac{\mathbf{f} + \zeta}{\tau} \right) \right\rangle \\
&= \tau \sum_{i=1}^M \left[ a_i \exp \left( -\frac{f_i + \zeta}{\tau} \right) \log \frac{a_i \exp \left( -\frac{f_i + \zeta}{\tau} \right)}{a_i} - a_i \exp \left( -\frac{f_i + \zeta}{\tau} \right) + a_i \right] + \sum_{i=1}^M (f_i + \zeta) a_i \exp \left( -\frac{f_i + \zeta}{\tau} \right) \\
&= \sum_{i=1}^M \left[ -\tau a_i \exp \left( -\frac{f_i + \zeta}{\tau} \right) + \tau a_i \right].
\end{aligned} \tag{23}$$

966 Therefore we can obtain its Fenchel-Lagrange multipliers form of SemiUOT as:

$$\begin{aligned}
\min_{\mathbf{f}, \mathbf{g}, \zeta} \mathcal{J}_{\text{SemiUOT}} &= -\tau \text{KL}(\boldsymbol{\pi} \mathbf{1}_N \| \mathbf{a}) - \langle \mathbf{f} + \zeta, \boldsymbol{\pi} \mathbf{1}_N \rangle - \langle \mathbf{g} - \zeta, \boldsymbol{\pi}^\top \mathbf{1}_M \rangle \\
&= \tau \exp \left( -\frac{\zeta}{\tau} \right) \left\langle \mathbf{a}, \exp \left( -\frac{\mathbf{f}}{\tau} \right) \right\rangle - \langle \mathbf{g} - \zeta, \mathbf{b} \rangle + \mathcal{O}_{\text{Const}} \\
&\text{s.t. } f_i + g_j \leq C_{ij},
\end{aligned} \tag{24}$$

967 where  $\mathcal{O}_{\text{Const}} = -\sum_{i=1}^M \tau a_i$  and we can neglect it during the following calculation. Once we obtain  
968 the optimal solution on  $\mathbf{f}^*, \mathbf{g}^*$  and  $\zeta^*$ , we will discover that:

$$\tau \text{KL}(\boldsymbol{\pi} \mathbf{1}_N \| \mathbf{a}) = \tau \text{KL} \left( \left\langle \mathbf{a}, \exp \left( -\frac{\mathbf{f}^* + \zeta^*}{\tau} \right) \right\rangle \| \mathbf{a} \right) = \text{Const}. \tag{25}$$

969 Hence SemiUOT problem can be transformed into classic optimal transport problem accordingly.

970 Finally we can obtain the optimal solution on  $\zeta$  by considering  $\frac{\partial \mathcal{J}_{\text{SemiUOT}}}{\partial \zeta} = 0$  as below:

$$\zeta = \tau \left[ \log \left( \sum_{i=1}^M a_i \exp \left( -\frac{f_i}{\tau} \right) \right) - \log \left( \sum_{j=1}^N b_j \right) \right]. \tag{26}$$

971 Once we set  $\tau \rightarrow \infty$ , the results of the limitation will be shown as:

$$\lim_{\tau \rightarrow +\infty} a_i \exp \left( -\frac{f_i + \zeta}{\tau} \right) = \lim_{\tau \rightarrow +\infty} a_i \exp \left( -\frac{\zeta}{\tau} \right) = a_i \frac{\langle \mathbf{b}, \mathbf{1}_N \rangle}{\langle \mathbf{a}, \mathbf{1}_M \rangle} = \omega a_i. \tag{27}$$

972 Therefore we conclude the proof of the Proposition 1.  $\square$

## 973 C Proof of Proposition 2

974 **Proposition 2.** (Calculation for Approximate SemiUOT Equation) *Given Approximate SemiUOT*  
975 *equation  $\widehat{L}_P$ , it can be optimized via Equivalent Transformation Mechanism with Approximation*  
976 *(ETM-Approx). That is, ETM-Approx aims to solve the following equation for each  $\widehat{f}_s$ :*

$$\frac{\partial \widehat{L}_P}{\partial \widehat{f}_s} = -a_s \exp \left( -\frac{\widehat{f}_s + \zeta}{\tau} \right) + \exp \left( \frac{\widehat{f}_s}{\epsilon} \right) \sum_{j=1}^N \left[ \frac{b_j \exp \left( -\frac{C_{sj}}{\epsilon} \right)}{\sum_{k=1}^M \exp \left( \frac{\widehat{f}_k - C_{kj}}{\epsilon} \right)} \right] = 0. \tag{28}$$

977 Specifically, we can adopt fixed-point iteration method for solving Eq.(28) at the  $\ell$ -th iteration as  
978 follows:

$$\begin{cases} \widehat{f}_1^{\ell+1} = \nu \left[ \log \left( a_1 \exp \left( -\frac{\zeta}{\tau} \right) \right) - \log \left[ \sum_{j=1}^N \left( \frac{b_j}{\mathcal{W}_{\epsilon,j}(\widehat{\mathbf{f}}^\ell)} \exp \left( -\frac{C_{1j}}{\epsilon} \right) \right) \right] \right] \\ \vdots \\ \widehat{f}_M^{\ell+1} = \nu \left[ \log \left( a_M \exp \left( -\frac{\zeta}{\tau} \right) \right) - \log \left[ \sum_{j=1}^N \left( \frac{b_j}{\mathcal{W}_{\epsilon,j}(\widehat{\mathbf{f}}^\ell)} \exp \left( -\frac{C_{Mj}}{\epsilon} \right) \right) \right] \right] \end{cases}, \tag{29}$$

979 where  $\nu = \tau\epsilon/(\tau + \epsilon)$  for simplification and  $\mathcal{W}_{\epsilon,j}(\hat{\mathbf{f}}^\ell)$  denotes the corresponding calculation:

$$\mathcal{W}_{\epsilon,j}(\hat{\mathbf{f}}^\ell) = \sum_{k=1}^M \exp\left(\frac{\hat{f}_k^\ell - C_{kj}}{\epsilon}\right). \quad (30)$$

980 The proposed procedure can be convergent with a theoretical guarantee. Finally, updating the  
 981 Lagrange multiplier  $\zeta$  by further considering  $\nabla_{\zeta} \hat{L}_P = 0$  via  $\zeta = \tau[\log(\sum_{i=1}^M a_i \exp(-\hat{f}_i/\tau)) -$   
 982  $\log(\sum_{j=1}^N b_j)]$ . One can achieve the optimal results on  $\hat{\mathbf{f}}^*$  and  $\zeta^*$  via iterative computing accordingly.

983 *Proof.* We first review the proposed Approximate SemiUOT Equation  $\hat{L}_P$  as below:

$$\min_{\hat{\mathbf{f}}, \zeta} \hat{L}_P = \tau \sum_{i=1}^M a_i e^{-\frac{\hat{f}_i + \zeta}{\tau}} + \sum_{j=1}^N b_j \left[ \epsilon \log \left[ \sum_{k=1}^M e^{\frac{\hat{f}_k - C_{kj}}{\epsilon}} \right] + \zeta \right]. \quad (31)$$

984 Then we consider optimizing  $\hat{f}_s$  as follows:

$$\frac{\partial \hat{L}_P}{\partial \hat{f}_s} = 0 \Rightarrow \exp\left(\frac{\tau + \epsilon}{\tau\epsilon} \hat{f}_s\right) = \frac{a_s e^{-\frac{\zeta}{\tau}}}{\sum_{j=1}^N \left( \frac{b_j \exp(-C_{sj}/\epsilon)}{\mathcal{W}_{\epsilon,j}(\hat{\mathbf{f}})} \right)}, \quad (32)$$

985 where  $\mathcal{W}_{\epsilon,j}(\hat{\mathbf{f}})$  is defined as Eq.(30). At that time we adopt fixed-point iteration method to optimize  
 986  $\hat{\mathbf{f}}$  accordingly:

$$\begin{cases} \hat{f}_1^{\ell+1} = \nu \left[ \log(a_1 e^{-\frac{\zeta}{\tau}}) - \log \left[ \sum_{j=1}^N \left( \frac{b_j e^{-C_{1j}/\epsilon}}{\mathcal{W}_{\epsilon,j}(\hat{\mathbf{f}}^\ell)} \right) \right] \right] = \mathcal{F}_1(\hat{f}_1^\ell, \dots, \hat{f}_M^\ell) \\ \vdots \\ \hat{f}_s^{\ell+1} = \nu \left[ \log(a_s e^{-\frac{\zeta}{\tau}}) - \log \left[ \sum_{j=1}^N \left( \frac{b_j e^{-C_{sj}/\epsilon}}{\mathcal{W}_{\epsilon,j}(\hat{\mathbf{f}}^\ell)} \right) \right] \right] = \mathcal{F}_s(\hat{f}_1^\ell, \dots, \hat{f}_M^\ell) \\ \vdots \\ \hat{f}_M^{\ell+1} = \nu \left[ \log(a_M e^{-\frac{\zeta}{\tau}}) - \log \left[ \sum_{j=1}^N \left( \frac{b_j e^{-C_{Mj}/\epsilon}}{\mathcal{W}_{\epsilon,j}(\hat{\mathbf{f}}^\ell)} \right) \right] \right] = \mathcal{F}_M(\hat{f}_1^\ell, \dots, \hat{f}_M^\ell) \end{cases}, \quad (33)$$

987 where  $\nu = \frac{\tau\epsilon}{\tau + \epsilon}$ . By taking the gradient on  $\mathcal{F}_s(\hat{f}_s^\ell)$  w.r.t  $\hat{f}_s^\ell$ , we can observe that:

$$\begin{aligned} \frac{\partial \mathcal{F}_s(\hat{f}_s^\ell)}{\partial \hat{f}_s^\ell} &= -\frac{\tau\epsilon}{\tau + \epsilon} \frac{1}{\sum_{j=1}^N \left[ \frac{\exp(-\frac{C_{sj}}{\epsilon})}{\mathcal{W}_{\epsilon,j}(\hat{\mathbf{f}}^\ell)} \right]} \frac{\partial}{\partial \hat{f}_s^\ell} \left( \sum_{j=1}^N \left[ \frac{\exp(-\frac{C_{sj}}{\epsilon})}{\mathcal{W}_{\epsilon,j}(\hat{\mathbf{f}}^\ell)} \right] b_j \right) \\ &= \frac{\tau}{\tau + \epsilon} \underbrace{\frac{1}{\sum_{j=1}^N \left[ \frac{\exp(-\frac{C_{sj}}{\epsilon})}{\mathcal{W}_{\epsilon,j}(\hat{\mathbf{f}}^\ell)} \right]} \sum_{j=1}^N \left[ \frac{b_j \exp(-\frac{C_{sj}}{\epsilon})}{\mathcal{W}_{\epsilon,j}(\hat{\mathbf{f}}^\ell)} \cdot \frac{\exp(-\frac{\hat{f}_s^\ell - C_{sj}}{\epsilon})}{\mathcal{W}_{\epsilon,j}(\hat{\mathbf{f}}^\ell)} \right]}_{<1} \end{aligned} \quad (34)$$

$< 1$ .

988 Likewise we can obtain the result:

$$\begin{aligned}
\mathcal{F}_s(\hat{f}_1^\ell, \dots, \hat{f}_M^\ell) &= \left| \frac{\partial \mathcal{F}_s(\hat{f}_1^\ell)}{\partial \hat{f}_1^\ell} \right| + \dots + \left| \frac{\partial \mathcal{F}_s(\hat{f}_s^\ell)}{\partial \hat{f}_s^\ell} \right| + \dots + \left| \frac{\partial \mathcal{F}_s(\hat{f}_M^\ell)}{\partial \hat{f}_M^\ell} \right| \\
&= \frac{\tau}{\tau + \epsilon} \frac{1}{\sum_{j=1}^N \left[ \frac{\exp(-\frac{C_{sj}}{\epsilon})}{\mathcal{W}_{\epsilon,j}(\hat{\mathbf{f}}^\ell)} \right]} \sum_{j=1}^N \left[ \frac{b_j \exp(-\frac{C_{sj}}{\epsilon})}{\mathcal{W}_{\epsilon,j}(\hat{\mathbf{f}}^\ell)} \cdot \sum_{u=1}^M \left( \frac{\exp(\frac{\hat{f}_u^\ell - C_{uj}}{\epsilon})}{\mathcal{W}_{\epsilon,j}(\hat{\mathbf{f}}^\ell)} \right) \right] \\
&= \frac{\tau}{\tau + \epsilon} < 1.
\end{aligned} \tag{35}$$

989 We can easily conclude that:

$$\begin{cases} \mathcal{F}_1(\hat{f}_1^\ell, \dots, \hat{f}_M^\ell) < 1 \\ \vdots \\ \mathcal{F}_s(\hat{f}_1^\ell, \dots, \hat{f}_M^\ell) < 1 \\ \vdots \\ \mathcal{F}_M(\hat{f}_1^\ell, \dots, \hat{f}_M^\ell) < 1 \end{cases} \tag{36}$$

990 Therefore, we can conclude that the proposed ETM-Approx method guarantees convergence according  
991 to Theorem 2.9 in [61].  $\square$

992 **Remark 1.** ETM-Approx can reach the linear convergence rate via the fixed-point iteration shown as  
993  $\mathcal{O}(NM \log(1/\varepsilon_{\text{err}}))$  where  $\varepsilon_{\text{err}} = \|\hat{\mathbf{f}} - \hat{\mathbf{f}}^*\|_\infty$  and  $\hat{\mathbf{f}}^*$  denotes the optimal solution.

994 *Proof.* We can formulate the whole optimization process for Proposition 2 as below :

$$\begin{cases} \hat{f}_1^{\ell+1} = \mathcal{F}_1(\hat{f}_1^\ell, \dots, \hat{f}_M^\ell) \\ \vdots \\ \hat{f}_s^{\ell+1} = \mathcal{F}_s(\hat{f}_1^\ell, \dots, \hat{f}_M^\ell) \\ \vdots \\ \hat{f}_M^{\ell+1} = \mathcal{F}_M(\hat{f}_1^\ell, \dots, \hat{f}_M^\ell) \end{cases} \Rightarrow (\hat{f}_1^{(\ell+1)}, \dots, \hat{f}_M^{(\ell+1)}) = \mathcal{F}_{\text{update}}(\hat{f}_1^{(\ell)}, \dots, \hat{f}_M^{(\ell)}). \tag{37}$$

995 According to the above discussion, we have the following results:

$$\begin{aligned}
\|\hat{\mathbf{f}}^{(\ell+1)} - \hat{\mathbf{f}}^*\|_\infty &= \|\mathcal{F}_{\text{update}}(\hat{\mathbf{f}}^{(\ell)}) - \mathcal{F}_{\text{update}}(\hat{\mathbf{f}}^*)\|_\infty \\
&\leq \frac{\tau}{\tau + \epsilon} \|\hat{\mathbf{f}}^{(\ell)} - \hat{\mathbf{f}}^*\|_\infty \\
&\leq \frac{\tau}{\tau + \epsilon} \|\hat{\mathbf{f}}^{(\ell+1)} - \hat{\mathbf{f}}^*\|_\infty + \frac{\tau}{\tau + \epsilon} \|\hat{\mathbf{f}}^{(\ell+1)} - \hat{\mathbf{f}}^{(\ell)}\|_\infty.
\end{aligned} \tag{38}$$

996 Therefore the error between the solution  $\hat{\mathbf{f}}^{(\ell+1)}$  at the  $(\ell + 1)$  iteration and the optimal results  $\hat{\mathbf{f}}^*$  is  
997 given as:

$$\|\hat{\mathbf{f}}^{(\ell+1)} - \hat{\mathbf{f}}^*\|_\infty \leq \frac{\tau + \epsilon}{\epsilon} \left( \frac{\tau}{\tau + \epsilon} \right)^\ell \|\hat{\mathbf{f}}^{(1)} - \hat{\mathbf{f}}^{(0)}\|_\infty. \tag{39}$$

998 Hence ETM-Approx can be linear convergence via the fixed-point iteration shown as  
999  $\mathcal{O}(NM \log(1/\varepsilon_{\text{err}}))$  where  $\varepsilon_{\text{err}} = \|\hat{\mathbf{f}} - \hat{\mathbf{f}}^*\|_\infty$  and  $\hat{\mathbf{f}}^*$  denotes the optimal solution.  $\square$

## 1000 D Algorithm for ETM-Based Method on SemiUOT

1001 We also provide the pseudo algorithm of the proposed ETM-Based approaches (e.g., ETM-Exact,  
1002 ETM-Approx, and ETM-Refine) for solving SemiUOT in Alg.1 to make a clearer illustration.

---

**Algorithm 1** The algorithm of ETM-Based method on SemiUOT

---

**Input:**  $C$ : cost matrix;  $\mathbf{a}, \mathbf{b}$ : initial marginal probability;  $\tau, \epsilon$ : Hyper parameters.

Randomly initialize the value of  $\mathbf{f}^{\text{init}}$ .

Choose ETM-Exact, ETM-Approx or ETM-Refine on SemiUOT for optimization.

**(1) Function:** ETM-Exact on SemiUOT( $C, \mathbf{a}, \mathbf{b}, \tau, \mathbf{f}^{t=0} = \mathbf{f}^{\text{init}}$ )

Optimize  $\mathbf{f}$  via L-BFGS algorithm on  $L_P$  as:

$$\min_{\mathbf{f}} L_P = \tau \sum_{i=1}^M a_i \exp\left(-\frac{f_i + \zeta}{\tau}\right) - \sum_{j=1}^N \left[ \inf_{k \in [M]} [C_{kj} - f_k] - \zeta \right] b_j,$$

Optimize  $\mathbf{g}$  via  $g_j = \inf_{k \in [M]} (C_{kj} - f_k^t)$ .

Optimize  $\zeta$  via  $\zeta = \tau [\log(\sum_{i=1}^M a_i \exp(-f_i/\tau)) - \log(\sum_{j=1}^N b_j)]$  as shown in Eq.(26).

**Return:** The optimal solutions of  $\mathbf{f}^*, \mathbf{g}^*$  and  $\zeta^*$ .

**(2) Function:** ETM-Approx on SemiUOT( $C, \mathbf{a}, \mathbf{b}, \tau, \hat{\mathbf{f}}^{t=0} = \mathbf{f}^{\text{init}}$ )

Optimize  $\hat{\mathbf{f}}$  via Proposition 2 on  $\hat{L}_P$  as:

$$\min_{\hat{\mathbf{f}}} \hat{L}_P = \tau \sum_{i=1}^M a_i \exp\left(-\frac{\hat{f}_i + \zeta}{\tau}\right) + \sum_{j=1}^N b_j \left[ \epsilon \log \left[ \sum_{k=1}^M \exp\left(\frac{\hat{f}_k - C_{kj}}{\epsilon}\right) \right] + \zeta \right]$$

Optimize  $\hat{\mathbf{g}}$  via  $\hat{g}_j = -\epsilon \log[\sum_{k=1}^M \exp((\hat{f}_k - C_{kj})/\epsilon)]$ .

Optimize  $\zeta$  via  $\zeta = \tau [\log(\sum_{i=1}^M a_i \exp(-\hat{f}_i/\tau)) - \log(\sum_{j=1}^N b_j)]$  as shown in Eq.(26).

**Return:** The optimal solutions of  $\hat{\mathbf{f}}^*, \hat{\mathbf{g}}^*$  and  $\zeta^*$ .

**(3) Function:** ETM-Refine on SemiUOT( $C, \mathbf{a}, \mathbf{b}, \tau, \hat{\mathbf{f}}^{t=0} = \mathbf{f}^{\text{init}}$ )

Obtain  $\hat{\mathbf{f}}^* = \text{ETM-Approx on SemiUOT}(C, \mathbf{a}, \mathbf{b}, \tau, \hat{\mathbf{f}}^{t=0} = \mathbf{f}^{\text{init}})$ .

Obtain  $\mathbf{f}^* = \text{ETM-Exact on SemiUOT}(C, \mathbf{a}, \mathbf{b}, \tau, \mathbf{f}^{t=0} = \hat{\mathbf{f}}^*)$ .

**Return:** The optimal solutions of  $\mathbf{f}^*, \mathbf{g}^*$  and  $\zeta^*$ .

---

## 1003 E Proof of Proposition 3

1004 **Proposition 3.** (Principles of Equivalent Transformation Mechanism for UOT) *Given UOT with*  
1005 *KL-Divergence  $\mathcal{J}_{\text{UOT}}$ , its Fenchel-Lagrange multipliers form is given:*

$$\begin{aligned} \min_{\mathbf{u}, \mathbf{v}, \zeta} & \left[ \tau_a \sum_{i=1}^M a_i e^{-\frac{u_i + \zeta}{\tau_a}} + \tau_b \sum_{j=1}^N b_j e^{-\frac{v_j - \zeta}{\tau_b}} \right] \\ \text{s.t. } & u_i + v_j + s_{ij} = C_{ij}, \quad s_{ij} \geq 0, \end{aligned} \quad (40)$$

1006 where  $\mathbf{u}, \mathbf{v}, \mathbf{s}$  and  $\zeta$  denote Lagrange multipliers. Moreover, UOT problem can also be transformed  
1007 into classic optimal transport as follows:

$$\begin{aligned} \min_{\boldsymbol{\pi} \geq 0} & \mathcal{J}_{\text{U}} = \langle C, \boldsymbol{\pi} \rangle \\ \text{s.t. } & \begin{cases} \boldsymbol{\pi} \mathbf{1}_N = \mathbf{a} \odot \exp\left(-\frac{\mathbf{u}^* + \zeta^*}{\tau_a}\right) = \boldsymbol{\alpha} \\ \boldsymbol{\pi}^\top \mathbf{1}_M = \mathbf{b} \odot \exp\left(-\frac{\mathbf{v}^* - \zeta^*}{\tau_b}\right) = \boldsymbol{\beta} \end{cases} \end{aligned} \quad (41)$$

1008 Note that when  $\tau_a, \tau_b \rightarrow \infty$ , the source and target marginal probabilities can be determined as  
1009  $\boldsymbol{\pi} \mathbf{1}_N = \sqrt{\omega} \mathbf{a}$  and  $\boldsymbol{\pi}^\top \mathbf{1}_M = \mathbf{b} / \sqrt{\omega}$  where  $\omega = \langle \mathbf{b}, \mathbf{1}_N \rangle / \langle \mathbf{a}, \mathbf{1}_M \rangle$  respectively.

1010 *Proof.* To start with, we first rewrite the optimization problem as below:

$$\begin{aligned} \min_{\pi \geq 0} J &= \langle \mathbf{C}, \pi \rangle + \tau_a \text{KL}(\pi \mathbf{1}_N \| \mathbf{a}) + \tau_b \text{KL}(\pi^\top \mathbf{1}_M \| \mathbf{b}) \\ \text{s.t. (Optional)} : \quad &\pi \mathbf{1}_N = \alpha, \quad \pi^\top \mathbf{1}_M = \beta. \end{aligned} \quad (42)$$

1011 where  $\alpha$  and  $\beta$  denote the marginal probabilities for source and target domains respectively. Note  
1012 that we do not need the true value for  $\alpha$  and  $\beta$  beforehand. That is, the constraints here are optional  
1013 for the following UOT deduction. The Lagrange multipliers of UOT with KL-Divergence is given as:

$$\max_{\mathbf{s} \geq 0, \mathbf{u}, \mathbf{v}, \zeta} \min_{\pi \geq 0} \mathcal{J}_{\text{UOT}} = \tau_a \text{KL}(\pi \mathbf{1}_N \| \mathbf{a}) + \langle \mathbf{u} + \zeta, \pi \mathbf{1}_N \rangle + \tau_b \text{KL}(\pi^\top \mathbf{1}_M \| \mathbf{b}) + \langle \mathbf{v} - \zeta, \pi^\top \mathbf{1}_M \rangle + \mathcal{C}_{\text{UOT}}, \quad (43)$$

1014 where  $\mathcal{C}_{\text{UOT}} = \sum_{i,j} (C_{ij} - u_i - v_j - s_{ij}) \pi_{ij} = \langle \mathbf{C} - \mathbf{u} \otimes \mathbf{1}_N^\top - \mathbf{1}_M \otimes \mathbf{v}^\top - \mathbf{s}, \pi \rangle$  and  $\mathbf{u}, \mathbf{v}$  and  $\zeta$   
1015 are dual variables. By taking the differentiation on  $\pi_{ij}$  we have:

$$\begin{aligned} \frac{\partial \mathcal{J}_{\text{UOT}}}{\partial \pi_{ij}} &= \left[ \tau_a \log \frac{\sum_{j=1}^N \pi_{ij}}{a_i} + u_i + \zeta \right] + \left[ \tau_b \log \frac{\sum_{i=1}^M \pi_{ij}}{b_j} + v_j - \zeta \right] + (C_{ij} - u_i - v_j - s_{ij}) \\ &= C_{ij} + \tau_a \log \frac{\sum_{j=1}^N \pi_{ij}}{a_i} + \tau_b \log \frac{\sum_{i=1}^M \pi_{ij}}{b_j} - s_{ij} = 0. \end{aligned} \quad (44)$$

1016 Then we can obtain the results:

$$\begin{cases} \sum_{j=1}^N \pi_{ij} = a_i \exp\left(-\frac{u_i + \zeta}{\tau_a}\right) \\ \sum_{i=1}^M \pi_{ij} = b_j \exp\left(-\frac{v_j - \zeta}{\tau_b}\right) \\ C_{ij} - u_i - v_j - s_{ij} = 0 \end{cases} \quad (45)$$

1017 By taking the above results into KL-Divergence, we can further simplify the results:

$$\begin{cases} \tau_a \text{KL}(\pi \mathbf{1}_N \| \mathbf{a}) + \langle \mathbf{u} + \zeta, \pi \mathbf{1}_N \rangle = \sum_{i=1}^M \left[ -\tau_a a_i \exp\left(-\frac{u_i + \zeta}{\tau_a}\right) + \tau_a a_i \right] \\ \tau_b \text{KL}(\pi^\top \mathbf{1}_M \| \mathbf{b}) + \langle \mathbf{v} - \zeta, \pi^\top \mathbf{1}_M \rangle = \sum_{j=1}^N \left[ -\tau_b b_j \exp\left(-\frac{v_j - \zeta}{\tau_b}\right) + \tau_b b_j \right] \end{cases} \quad (46)$$

1018 Therefore we can obtain its Fenchel-Lagrange multipliers form of UOT as:

$$\begin{aligned} \min_{\mathbf{u}, \mathbf{v}, \zeta} \mathcal{J}_{\text{UOT}} &= -\tau_a \text{KL}(\pi \mathbf{1}_N \| \mathbf{a}) - \langle \mathbf{u} + \zeta, \pi \mathbf{1}_N \rangle - \tau_b \text{KL}(\pi^\top \mathbf{1}_M \| \mathbf{b}) - \langle \mathbf{v} - \zeta, \pi^\top \mathbf{1}_M \rangle \\ &= \tau_a \exp\left(-\frac{\zeta}{\tau_a}\right) \left\langle \mathbf{a}, \exp\left(-\frac{\mathbf{u}}{\tau_a}\right) \right\rangle + \tau_b \exp\left(\frac{\zeta}{\tau_b}\right) \left\langle \mathbf{b}, \exp\left(-\frac{\mathbf{v}}{\tau_b}\right) \right\rangle + \mathcal{O}_{\text{Const}} \\ \text{s.t. } &u_i + v_j \leq C_{ij}, \end{aligned} \quad (47)$$

1019 where  $\mathcal{O}_{\text{Const}} = -\sum_{i=1}^M \tau_a a_i - \sum_{j=1}^N \tau_b b_j$ , and we can neglect it during the following calculation.  
1020 Once we obtain the optimal solution on  $\mathbf{u}^*, \mathbf{v}^*$  and  $\zeta^*$ , the KL-Divergence will turn out to be  
1021 constants and therefore the original optimization problem can be transformed into classic optimal  
1022 transport. Finally we can obtain the optimal solution on  $\zeta$  by considering  $\frac{\partial \mathcal{J}_{\text{UOT}}}{\partial \zeta} = 0$  as below:

$$\zeta = \frac{\tau_a \tau_b}{\tau_a + \tau_b} \left[ \log \left\langle \mathbf{a}, \exp\left(-\frac{\mathbf{u}}{\tau_a}\right) \right\rangle - \log \left\langle \mathbf{b}, \exp\left(-\frac{\mathbf{v}}{\tau_b}\right) \right\rangle \right]. \quad (48)$$

1023 Once we set  $\tau_a \rightarrow \infty$  and  $\tau_b \rightarrow \infty$ , the results of the limitation will be shown as:

$$\begin{aligned} \lim_{\tau_a \rightarrow +\infty, \tau_b \rightarrow +\infty} a_i \exp\left(-\frac{u_i + \zeta}{\tau_a}\right) &= \lim_{\tau_a \rightarrow +\infty, \tau_b \rightarrow +\infty} a_i \exp\left(-\frac{\zeta}{\tau_a}\right) = a_i \sqrt{\frac{\langle \mathbf{b}, \mathbf{1}_N \rangle}{\langle \mathbf{a}, \mathbf{1}_M \rangle}} = \sqrt{\omega} a_i, \\ \lim_{\tau_a \rightarrow +\infty, \tau_b \rightarrow +\infty} b_j \exp\left(-\frac{v_j - \zeta}{\tau_b}\right) &= \lim_{\tau_a \rightarrow +\infty, \tau_b \rightarrow +\infty} b_j \exp\left(-\frac{\zeta}{\tau_b}\right) = b_j \sqrt{\frac{\langle \mathbf{a}, \mathbf{1}_M \rangle}{\langle \mathbf{b}, \mathbf{1}_N \rangle}} = \frac{1}{\sqrt{\omega}} b_j. \end{aligned} \quad (49)$$

1024 Therefore we conclude the proof of the Proposition 3.  $\square$

## 1025 F Illustrations of Optimization 1

1026 **Optimization 1.** (Calculation of ETM-Approx approach for UOT) To start with, we first review the  
1027 Exact UOT Equation is defined as:

$$\begin{aligned} \min_{\mathbf{u}, \zeta} L_U &= \tau_a \sum_{i=1}^M a_i \exp\left(-\frac{u_i + \zeta}{\tau_a}\right) + \tau_b \exp\left(\frac{\zeta}{\tau_b}\right) \sum_{j=1}^N b_j \exp\left(-\frac{v_j}{\tau_b}\right) \\ &= \tau_a \sum_{i=1}^M a_i \exp\left(-\frac{u_i + \zeta}{\tau_a}\right) + \tau_b \exp\left(\frac{\zeta}{\tau_b}\right) \sum_{j=1}^N b_j \exp\left(\frac{\sup_{k \in [M]} (u_k - C_{kj})}{\tau_b}\right), \end{aligned} \quad (50)$$

1028 where  $v_j = -\sup_{k \in [M]} (u_k - C_{kj})$  meanwhile the marginal probabilities are set as  $\boldsymbol{\pi} \mathbf{1}_N = \mathbf{a} \odot$   
1029  $\exp(-(\mathbf{u} + \zeta)/\tau_a) = \boldsymbol{\alpha}$  and  $\boldsymbol{\pi}^\top \mathbf{1}_M = \mathbf{b} \odot \exp(-(\mathbf{v} - \zeta)/\tau_b) = \boldsymbol{\beta}$ . Since the optimization  
1030 problem in Eq.(9) is convex, we can also utilize block gradient descent to optimize the problem.  
1031 Specifically, we first fix  $v^l$  and optimize variable  $u^l$  at the  $l$ -th iteration by replacing the original  
1032 marginal probability  $\mathbf{b}$  in Eq.(6) with  $\boldsymbol{\beta}$  accordingly to transform UOT into SemiUOT problem:

$$\begin{aligned} \min_{\boldsymbol{\pi} \geq 0} J_U^u &= \langle \mathbf{C}, \boldsymbol{\pi} \rangle + \tau_a \text{KL}(\boldsymbol{\pi} \mathbf{1}_N \| \mathbf{a}), \\ \text{s.t.} \quad &\begin{cases} (\text{Constraint}) : \boldsymbol{\pi}^\top \mathbf{1}_M = \mathbf{b} \odot \exp\left(-\frac{\mathbf{v} - \zeta}{\tau_b}\right) = \boldsymbol{\beta} \\ (\text{Optional}) : \boldsymbol{\pi} \mathbf{1}_N = \mathbf{a} \odot \exp\left(-\frac{\mathbf{u} + \zeta}{\tau_a}\right) = \boldsymbol{\alpha} \end{cases}. \end{aligned} \quad (51)$$

1033 At that time, the Fenchel-Lagrange multipliers form of Eq.(51) is given via the Proposition 1:

$$\begin{aligned} \min_{\mathbf{u}} L_U^u &= \tau_a \sum_{i=1}^M a_i \exp\left(-\frac{\tilde{u}_i + \zeta}{\tau_a}\right) - \sum_{j=1}^N \beta_j (\tilde{v}_j - \zeta) \\ &= \tau_a \sum_{i=1}^M a_i \exp\left(-\frac{u_i + \zeta}{\tau_a}\right) - \sum_{j=1}^N \left( \inf_{k \in [M]} [C_{kj} - u_k] - \zeta \right) \beta_j. \end{aligned} \quad (52)$$

1034 Note that  $\tilde{\mathbf{u}}$  and  $\tilde{\mathbf{v}}$  denote the Lagrange multiplier for Eq.(51) while we have  $\tilde{v}_j =$   
1035  $\inf_{k \in [M]} [C_{kj} - u_k] = v_j$  and  $\tilde{\mathbf{u}} = \mathbf{u}$ . To further accelerate the optimization process, we consider to  
1036 make a smooth approximation on replacing  $\inf(\cdot)$  as  $\inf_{k \in [M]} [C_{kj} - u_k] \approx -\epsilon \log[\sum_{k=1}^M e^{\frac{u_k - C_{kj}}{\epsilon}}] =$   
1037  $\hat{v}_j$ . Therefore, we first fix  $\hat{v}^l$  and optimize variable  $\hat{u}^l$  at the  $l$ -th iteration to solve the following  
1038 equation on  $\hat{L}_U^u$  accordingly:

$$\begin{aligned} \min_{\hat{\mathbf{u}}} \hat{L}_U^u &= \tau_a \sum_{i=1}^M a_i \exp\left(-\frac{\hat{u}_i + \zeta}{\tau_a}\right) + \sum_{j=1}^N \beta_j \left[ \epsilon \log \left[ \sum_{k=1}^M e^{\frac{\hat{u}_k - C_{kj}}{\epsilon}} \right] + \zeta \right] \\ &= \tau_a \sum_{i=1}^M a_i \exp\left(-\frac{\hat{u}_i + \zeta}{\tau_a}\right) + \sum_{j=1}^N b_j \exp\left(-\frac{\hat{v}_j - \zeta}{\tau_b}\right) \left[ \epsilon \log \left[ \sum_{k=1}^M e^{\frac{\hat{u}_k - C_{kj}}{\epsilon}} \right] + \zeta \right]. \end{aligned} \quad (53)$$



1039 The optimization objective shares a similar formulation as Eq.31. At that time we adopt fixed-point  
 1040 iteration method to optimize  $\hat{\mathbf{u}}$  accordingly based on the Proposition 2:

$$\begin{cases} \hat{u}_1^{\ell+1} = \frac{\tau_a \epsilon}{\tau_a + \epsilon} \left[ \log \left( a_1 e^{-\frac{\zeta}{\tau_a}} \right) - \log \left[ \sum_{j=1}^N \left( \frac{\beta_j e^{-C_{1j}/\epsilon}}{\mathcal{W}_{\epsilon,j}(\hat{\mathbf{u}}^\ell)} \right) \right] \right] = \mathcal{U}_1(\hat{u}_1^\ell, \dots, \hat{u}_M^\ell) \\ \vdots \\ \hat{u}_s^{\ell+1} = \frac{\tau_a \epsilon}{\tau_a + \epsilon} \left[ \log \left( a_s e^{-\frac{\zeta}{\tau_a}} \right) - \log \left[ \sum_{j=1}^N \left( \frac{\beta_j e^{-C_{sj}/\epsilon}}{\mathcal{W}_{\epsilon,j}(\hat{\mathbf{u}}^\ell)} \right) \right] \right] = \mathcal{U}_s(\hat{u}_1^\ell, \dots, \hat{u}_M^\ell) \\ \vdots \\ \hat{u}_M^{\ell+1} = \frac{\tau_a \epsilon}{\tau_a + \epsilon} \left[ \log \left( a_M e^{-\frac{\zeta}{\tau_a}} \right) - \log \left[ \sum_{j=1}^N \left( \frac{\beta_j e^{-C_{Mj}/\epsilon}}{\mathcal{W}_{\epsilon,j}(\hat{\mathbf{u}}^\ell)} \right) \right] \right] = \mathcal{U}_M(\hat{u}_1^\ell, \dots, \hat{u}_M^\ell) \end{cases} \quad (54)$$

1041 The iteration process can be shown to converge efficiently based on Proposition 2. After that we fix  
 1042  $\hat{\mathbf{u}}$  and optimize variable  $\hat{v}$  via  $\hat{v}_j = -\epsilon \log[\sum_{k=1}^M \exp((\hat{u}_k - C_{kj})/\epsilon)]$ . We can achieve the optimal  
 1043 solution on  $\hat{\mathbf{u}}^*$  and  $\hat{\mathbf{v}}^*$  via iteratively computing via the above procedure accordingly. Finally, we  
 1044 update  $\zeta$  via  $\zeta = (\tau_a \tau_b / (\tau_a + \tau_b)) [\log(\sum_{i=1}^M a_i \exp(-\hat{u}_i^* / \tau_a)) - \log(\sum_{j=1}^N b_j \exp(-\hat{v}_j^* / \tau_b))]$ .

## 1045 G Algorithm for ETM-Based Method on UOT

1046 We also provide the pseudo algorithm of the proposed ETM-Based approaches (e.g., ETM-Exact,  
 1047 ETM-Approx and ETM-Refine) for solving UOT in Alg.2 to make a more clear illustration.

## 1048 H Proof of Proposition 4

1049 **Proposition 4.** (The Definition and Usage of KKT-Multiplier Regularization) *Given any OT with*  
 1050 *multiplier  $\mathbf{s}$ , one can obtain accurate solution  $\pi^*$  via proposed KKT-multiplier regularization term*  
 1051  *$\mathcal{G}(\pi, \mathbf{s}) = \langle \pi, \mathbf{s} \rangle$ , which formulates Multiplier Regularized Optimal Transport (MROT):*

$$\begin{aligned} \min_{\pi \geq 0} \mathcal{J}_G &= \langle \mathbf{C}, \pi \rangle + \eta_G \langle \pi, \mathbf{s} \rangle + \eta_{\text{Reg}} \mathcal{L}_{\text{Reg}}(\pi) \\ \text{s.t. } \pi \mathbf{1}_N &= \alpha, \quad \pi^\top \mathbf{1}_M = \beta, \end{aligned} \quad (55)$$

1052 where  $\mathcal{L}_{\text{Reg}}(\pi)$  denotes the regularization term on  $\pi$ .  $\alpha, \beta$  denote the final marginal probabilities  
 1053 obtained by ETM-based method, while  $\eta_{\text{Reg}}, \eta_G$  denotes the hyper parameter. Ideally,  $\eta_G$  should be  
 1054 set as a relatively large number. Meanwhile the dual form of MROT is given as:

$$\max_{\psi, \phi} L_G = \langle \alpha, \psi \rangle + \langle \beta, \phi \rangle - \eta_{\text{Reg}} \mathcal{L}_{\text{Reg}}^* \left( \frac{\psi_i + \phi_j - \tilde{C}_{ij}}{\eta_{\text{Reg}}} \right), \quad (56)$$

1055 where  $\tilde{C}_{ij} = C_{ij} + \eta_G s_{ij}$ ,  $\phi$  and  $\psi$  denote the Lagrange multipliers for MROT.  $\mathcal{L}_{\text{Reg}}^*(\cdot)$  denotes  
 1056 the conjugate function of  $\mathcal{L}_{\text{Reg}}(\cdot)$  and one can figure out the matching results of  $\pi$  via solving the  
 1057 following equation  $\nabla_{\pi_{ij}} \mathcal{L}_{\text{Reg}}(\pi_{ij}) = (\psi_i + \phi_j - \tilde{C}_{ij}) / \eta_{\text{Reg}}$ .

---

**Algorithm 2** The algorithm of ETM-Based method on UOT
 

---

**Input:**  $C$ : cost matrix;  $\mathbf{a}, \mathbf{b}$ : initial marginal probability;  $\tau_a, \tau_b, \epsilon$ : Hyper parameters.

Randomly initialize the value of  $\mathbf{u}^{\text{init}}$ .

Choose ETM-Exact, ETM-Approx or ETM-Refine on UOT for optimization.

**(1) Function:** ETM-Exact on UOT( $C, \mathbf{a}, \mathbf{b}, \tau_a, \tau_b, \mathbf{u}^{t=0} = \mathbf{u}^{\text{init}}$ )

Optimize  $\mathbf{u}$  L-BFGS algorithm to optimize  $L_U$  as:

$$\min_{\mathbf{u}} L_U = \tau_a \sum_{i=1}^M a_i \exp\left(-\frac{u_i + \zeta}{\tau_a}\right) + \tau_b \exp\left(\frac{\zeta}{\tau_b}\right) \sum_{j=1}^N b_j \exp\left(\frac{\sup_{k \in [M]} (u_k - C_{kj})}{\tau_b}\right)$$

Optimize  $\mathbf{v}$  via  $v_j = \inf_{k \in [M]} (C_{kj} - u_k)$ .

Optimize  $\zeta$  via  $\zeta = \frac{\tau_a \tau_b}{\tau_a + \tau_b} \left[ \log \left\langle \mathbf{a}, \exp\left(-\frac{\mathbf{u}}{\tau_a}\right) \right\rangle - \log \left\langle \mathbf{b}, \exp\left(-\frac{\mathbf{v}}{\tau_b}\right) \right\rangle \right]$  as shown in Eq.(48).

**Return:** The optimal solutions of  $\mathbf{u}^*$ ,  $\mathbf{v}^*$  and  $\zeta^*$ .

**(2) Function:** ETM-Approx on UOT( $C, \mathbf{a}, \mathbf{b}, \tau_a, \tau_b, \hat{\mathbf{u}}^{t=0} = \mathbf{u}^{\text{init}}$ )

Randomly initialize the value of  $\hat{\mathbf{v}}^{t'=1}$ .

**for**  $t' = 1$  to  $T'$  **do**

Optimize  $\hat{\mathbf{u}}^{t'}$  via Proposition 2 to optimize  $\hat{L}_U^u$  as:

$$\min_{\hat{\mathbf{u}}} \hat{L}_U^u = \tau_a \sum_{i=1}^M a_i \exp\left(-\frac{\hat{u}_i + \zeta}{\tau_a}\right) + \sum_{j=1}^N b_j \exp\left(-\frac{\hat{v}_j - \zeta}{\tau_b}\right) \left[ \epsilon \log \left[ \sum_{k=1}^M e^{\frac{\hat{u}_k - C_{kj}}{\epsilon}} \right] + \zeta \right]$$

Optimize  $\hat{\mathbf{v}}^{t'}$  via  $\hat{v}_j^{t'} = -\epsilon \log \left[ \sum_{k=1}^M \exp((\hat{u}_k^{t'} - C_{kj})/\epsilon) \right]$ .

**end for**

Optimize  $\zeta$  via  $\zeta = \frac{\tau_a \tau_b}{\tau_a + \tau_b} \left[ \log \left\langle \mathbf{a}, \exp\left(-\frac{\hat{\mathbf{u}}}{\tau_a}\right) \right\rangle - \log \left\langle \mathbf{b}, \exp\left(-\frac{\hat{\mathbf{v}}}{\tau_b}\right) \right\rangle \right]$  as shown in Eq.(48).

**Return:** The optimal solutions of  $\hat{\mathbf{u}}^*$ ,  $\hat{\mathbf{v}}^*$  and  $\zeta^*$ .

**(3) Function:** ETM-Refine on UOT( $C, \mathbf{a}, \mathbf{b}, \tau_a, \tau_b, \hat{\mathbf{u}}^{t=0} = \mathbf{u}^{\text{init}}$ )

Obtain  $\hat{\mathbf{u}}^* = \text{ETM-Approx on UOT}(C, \mathbf{a}, \mathbf{b}, \tau_a, \tau_b, \hat{\mathbf{u}}^{t=0} = \mathbf{u}^{\text{init}})$ .

Obtain  $\mathbf{u}^* = \text{ETM-Exact on UOT}(C, \mathbf{a}, \mathbf{b}, \tau_a, \tau_b, \mathbf{u}^{t=0} = \hat{\mathbf{u}}^*)$ .

**Return:** The optimal solutions of  $\mathbf{u}^*$ ,  $\mathbf{v}^*$  and  $\zeta^*$ .

---

1058 *Proof.* We first provide the Lagrange multiplier of MROT as:

$$\begin{aligned} \max_{\psi, \phi} \min_{\pi \geq 0} \mathcal{J}_{\text{MROT}} &= \langle C, \pi \rangle + \eta_G \langle \pi, s \rangle + \eta_{\text{Reg}} \mathcal{L}_{\text{Reg}}(\pi) - \langle \psi, \pi \mathbf{1}_N - \alpha \rangle - \langle \phi, \pi^\top \mathbf{1}_M - \beta \rangle \\ &= \langle \alpha, \psi \rangle + \langle \beta, \phi \rangle + \eta_{\text{Reg}} \inf_{\pi} \left[ \sum_{i,j} \left[ \frac{C_{ij} + \eta_G s_{ij} - \psi_i - \phi_j}{\eta_{\text{Reg}}} \pi_{ij} + \mathcal{L}_{\text{Reg}}(\pi_{ij}) \right] \right] \\ &= \langle \alpha, \psi \rangle + \langle \beta, \phi \rangle - \eta_{\text{Reg}} \sup_{\pi} \left[ \sum_{i,j} \left[ \frac{\psi_i + \phi_j - \tilde{C}_{ij}}{\eta_{\text{Reg}}} \pi_{ij} - \mathcal{L}_{\text{Reg}}(\pi_{ij}) \right] \right] \\ &= \langle \alpha, \psi \rangle + \langle \beta, \phi \rangle - \eta_{\text{Reg}} \mathcal{L}_{\text{Reg}}^* \left( \frac{\psi_i + \phi_j - \tilde{C}_{ij}}{\eta_{\text{Reg}}} \right). \end{aligned} \tag{57}$$

1059 At that time we have the following results:

$$\begin{cases} \frac{\partial \mathcal{J}_{\text{MROT}}}{\partial \psi_i} = 0 \\ \frac{\partial \mathcal{J}_{\text{MROT}}}{\partial \phi_j} = 0 \end{cases} \Rightarrow \begin{cases} \nabla_{\psi_i} \mathcal{L}_{\text{Reg}}^* \left( \frac{\psi_i + \phi_j - \tilde{C}_{ij}}{\eta_{\text{Reg}}} \right) = \alpha_i \\ \nabla_{\phi_j} \mathcal{L}_{\text{Reg}}^* \left( \frac{\psi_i + \phi_j - \tilde{C}_{ij}}{\eta_{\text{Reg}}} \right) = \beta_j \end{cases}. \tag{58}$$

1060 By taking the differentiation on  $\pi_{ij}$  we have:

$$\frac{\partial \mathcal{J}_{\text{MROT}}}{\partial \pi_{ij}} = \tilde{C}_{ij} + \eta_{\text{Reg}} \nabla_{\pi_{ij}} \mathcal{L}_{\text{Reg}}(\pi_{ij}) - \psi_i - \phi_j = 0. \tag{59}$$

Table 4: Classification accuracy (%) on Digits (Source: LeNet) and VisDA dataset (Source:ResNet50) for UDA (unsupervised domain adaptation) task

| Method                               | S→M      | M→U      | U→M      | Avg         | VisDA       |
|--------------------------------------|----------|----------|----------|-------------|-------------|
| Source                               | 68.3±0.3 | 65.3±0.5 | 66.2±0.2 | 66.6        | 52.4        |
| DeepJDOT [25]                        | 95.4±0.1 | 95.6±0.4 | 96.4±0.3 | 95.8        | 68.0        |
| JUMBOT [30]                          | 98.9±0.1 | 96.7±0.5 | 98.2±0.1 | 97.9        | 72.5        |
| JUMBOT + UOT(ETM-Refine + MROT-Ent)  | 99.4±0.1 | 98.7±0.3 | 99.2±0.1 | 99.1        | 73.6        |
| JUMBOT + UOT(ETM-Refine + MROT-Norm) | 99.7±0.1 | 99.3±0.2 | 99.6±0.1 | <b>99.5</b> | <b>74.2</b> |

For instance, when  $\mathcal{L}_{\text{Reg}}(\pi) = -\langle \pi, \log(\pi) - 1 \rangle$  denotes as the entropy regularization term, the dual form of MROT-Ent is shown as:

$$\begin{cases} \max_{\psi, \phi} \mathcal{J}_{\text{MROT-Ent}} = \langle \alpha, \psi \rangle + \langle \beta, \phi \rangle - \eta_{\text{Reg}} \sum_{i,j} \exp \left( \frac{\psi_i + \phi_j - \tilde{C}_{ij}}{\eta_{\text{Reg}}} \right) \\ \pi_{ij} = \exp \left( \frac{\psi_i + \phi_j - \tilde{C}_{ij}}{\eta_{\text{Reg}}} \right) \end{cases} \quad (60)$$

When  $\mathcal{L}_{\text{Reg}}(\pi) = \langle \pi, \pi \rangle / 2$  denotes the square-norm regularization term, the dual form of MROT-Norm is shown as:

$$\begin{cases} \max_{\psi, \phi} \mathcal{J}_{\text{MROT-Norm}} = \langle \alpha, \psi \rangle + \langle \beta, \phi \rangle - \frac{\eta_{\text{Reg}}}{2} \sum_{i,j} \left[ \frac{\psi_i + \phi_j - \tilde{C}_{ij}}{\eta_{\text{Reg}}} \right]_+^2 \\ \pi_{ij} = \left[ \frac{\psi_i + \phi_j - \tilde{C}_{ij}}{\eta_{\text{Reg}}} \right]_+ \end{cases} \quad (61)$$

Therefore we conclude the proof of Proposition 4.  $\square$

In summary, the time complexity of the proposed ETM-Approx+MROT-Ent or ETM-Approx+MROT-Norm method is provided as  $\mathcal{O}(NM \log(1/\varepsilon_{\text{err}}) + NMd_\pi)$ . Meanwhile, the time complexity of the proposed ETM-Refine+MROT-Ent or ETM-Refine+MROT-Norm method is provided as  $\mathcal{O}(NM \log(1/\varepsilon_{\text{err}}) + NMd_T + NMd_\pi)$ .

## I Experiments on Domain Adaptations

**Datasets.** We conduct the unsupervised domain adaptation tasks on *Digits*, *Office-Home*, and *VisDA*. *Digits* is the classic dataset for digit classification which contains three standard digit classification datasets: **MNIST** [48], **USPS**[40] and **SVHN** [67]. Each dataset consists of 10 classes of digits, ranging from 0 to 9. *Office-Home* [94] is a standard benchmark dataset which includes 15,500 images in 65 object classes in office and home settings, forming four dissimilar domains: Artistic images (**Ar**), Clip Art (**Cl**), Product images (**Pr**), and Real-World (**Rw**). *VisDA* [72] is a large-scale computer vision dataset on two domains, i.e., **Synthetic** and **Real** with 280K images in 12 classes.

**Performance.** We also conduct the UDA domain adaptation tasks on Digits and VisDA and the results are shown in Table.4. We can observe that the proposed ETM-Refine with MROT-Norm on SemiUOT achieves state-of-the-art performance on Digits and VisDA.

## J Experiments on Partial Domain Adaptations

**Datasets.** We further conduct the domain adaptation tasks on new datasets, i.e., *Office-31* [79] and *ImageCLEF* [13]. **Office-31** is the commonly-used computer vision dataset for domain adaptation with 4,652 images from three different domains: *Amazon* (**A**), *Webcam* (**W**) and *DSLR* (**D**). Target domain has the first 10 classes (alphabetical order) following [11]. **ImageCLEF** contains 3 domains with 12 classes, i.e., *Caltech* (**C**), *ImageNet* (**I**) and *Pascal* (**P**). Target domain has the first 6 classes (alphabetical order) following [57].

**Baselines.** We involve **DeepJDOT** [25], **ROT** [5], **JUMBOT** [30], **ETN** [12], **AR** [38], **m-POT** [68], **MOT** [56], as the model baselines for the domain adaptation task. (1) **DeepJDOT** [25] first

Table 5: H-score (%) on *Office-Home* for universal unsupervised domain adaptation

| Method                              | Ar→Cl        | Ar→Pr        | Ar→Rw        | Cl→Ar        | Cl→Pr        | Cl→Rw        | Pr→Ar        | Pr→Cl | Pr→Rw        | Rw→Ar        | Rw→Cl | Rw→Pr        | Avg          |
|-------------------------------------|--------------|--------------|--------------|--------------|--------------|--------------|--------------|-------|--------------|--------------|-------|--------------|--------------|
| ResNet [39]                         | 44.65        | 48.04        | 50.13        | 46.64        | 46.91        | 48.96        | 47.47        | 43.17 | 50.23        | 48.45        | 44.76 | 48.43        | 47.32        |
| OSBP [80]                           | 39.59        | 45.09        | 46.17        | 45.70        | 45.24        | 46.75        | 45.26        | 40.54 | 45.75        | 45.08        | 41.64 | 46.90        | 44.48        |
| UAN [100]                           | 51.64        | 51.70        | 54.30        | 61.74        | 57.63        | 61.86        | 50.38        | 47.62 | 61.46        | 62.87        | 52.61 | 65.19        | 56.58        |
| CMU [34]                            | 56.02        | 56.93        | 59.15        | 66.95        | 64.27        | 67.82        | 54.72        | 51.09 | 66.39        | 68.24        | 57.89 | 69.73        | 61.60        |
| DCC [49]                            | 57.97        | 54.05        | 58.01        | 74.64        | 70.62        | 77.52        | 64.34        | 73.60 | 74.94        | 80.96        | 75.12 | 80.38        | 70.18        |
| TNT [18]                            | 61.90        | 74.60        | 80.20        | 73.50        | 71.40        | 79.60        | 74.20        | 69.50 | 82.70        | 77.30        | 70.10 | 81.20        | 74.70        |
| UniOT [16]                          | 67.27        | 80.54        | 86.03        | 73.51        | 77.33        | 84.28        | 75.54        | 63.33 | 85.99        | 77.77        | 65.37 | 81.92        | 76.57        |
| UniOT + UOT(ETM-Refine + MROT-Ent)  | 68.63        | 81.72        | 87.94        | 75.88        | 79.03        | 86.21        | 77.29        | 68.77 | 87.14        | 78.59        | 73.62 | 82.83        | 78.97        |
| UniOT + UOT(ETM-Refine + MROT-Norm) | <b>69.02</b> | <b>81.95</b> | <b>88.36</b> | <b>76.12</b> | <b>79.36</b> | <b>86.49</b> | <b>77.03</b> | 69.25 | <b>87.30</b> | <b>78.93</b> | 74.18 | <b>82.96</b> | <b>79.25</b> |

Table 6: H-Score (%) on *Office-31* for universal unsupervised domain adaptation

| Method                              | A→D          | A→W          | D→A          | D→W          | W→A          | W→D          | Avg          |
|-------------------------------------|--------------|--------------|--------------|--------------|--------------|--------------|--------------|
| ResNet [39]                         | 49.78        | 47.92        | 48.48        | 54.94        | 48.96        | 55.60        | 50.94        |
| OSBP [80]                           | 51.14        | 50.23        | 49.75        | 55.53        | 50.16        | 57.20        | 52.34        |
| UAN [100]                           | 59.68        | 58.61        | 60.11        | 70.62        | 60.34        | 71.42        | 63.46        |
| CMU [34]                            | 68.11        | 67.33        | 71.42        | 79.32        | 72.23        | 80.42        | 73.14        |
| DCC [49]                            | 88.50        | 78.54        | 70.18        | 79.29        | 75.87        | 88.58        | 80.16        |
| TNT [18]                            | 85.70        | 80.40        | 83.80        | 92.00        | 79.10        | 91.20        | 85.37        |
| UniOT [16]                          | 86.97        | 88.48        | 88.35        | 98.83        | 87.60        | 96.57        | 91.13        |
| UniOT + UOT(ETM-Refine + MROT-Ent)  | 88.25        | 89.62        | 89.47        | 99.48        | 89.10        | 97.94        | 92.31        |
| UniOT + UOT(ETM-Refine + MROT-Norm) | <b>88.67</b> | <b>90.14</b> | <b>90.03</b> | <b>99.58</b> | <b>89.42</b> | <b>98.46</b> | <b>92.72</b> |

adopts optimal transport into solving domain adaptation problem with deep learning framework. (2) **ROT** [5] adopts robust optimal transport into adversarial training for domain adaptation. (3) **JUMBOT** [30] adopts mini-batch unbalanced optimal transport method for domain adaptation. (4) **ETN** [12] utilizes example transfer network to jointly learn domain-invariant representations and the progressive weighting scheme. (5) **AR** [38] adopts adversarial reweighting strategy on source domain data for alignment. (6) **m-POT** [68] adopts partial optimal transport method in the mini-batch settings for domain adaptation. (7) **MOT** [56] adopts masked unbalanced optimal transport technique on considering label information for PDA tasks.

## K Experiments on Universal Domain Adaptations

We further conduct the experiments on universal domain adaptations. That is, there are shared labels between the source and target domains. Additionally, there are private labels specific to each domain [29, 103]. We conduct the universal domain adaptations on both *Office-31* and *Office-Home*. Specifically, we set the first 10 classes in alphabetical order as the common label set, the next 10 classes as source private label and the rest 11 classes as target private label for Office-31. Likewise, we set the first 10 classes in alphabetical order as the common label set, the next 5 classes as source private label and the rest 55 classes as target private label for Office-Home. We involve the following models as baselines: (1) **OSBP** [80] adopts domain adversarial learning for open-set domain adaptation, (2) **UAN** [100] utilizes transferability criterion for universal domain adaptation, (3) **CMU** [34] learns to detect open classes with uncertainty estimation, (4) **DCC** [49] adopts domain consensus clustering for adaptation, (5) **TNT** [18] adopts evidential neighborhood contrastive learning for adaptation, (6) **UniOT** [16] adopts unbalanced optimal transport with adaptive filtering for transferring.

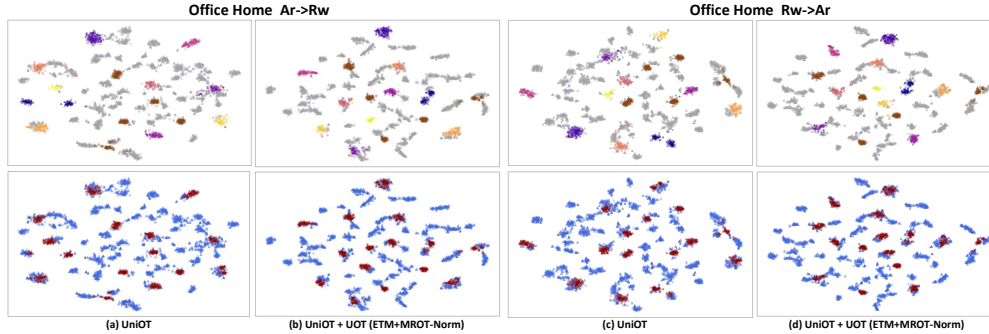

Figure 5: The T-SNE of data features on Ar → Rw (Office-Home) and Rw → Ar (Office-Home). The first row shows the original data sample distribution: The brown and gray colors denote the source and target private classes, respectively. The rest are common label set with different colors. The second row indicates the mapping between source and target domains: The red and blue points denote the source and target samples, respectively.

Table 7: Experimental results on Treatment Effect Estimation tasks.

|                                     | ACIC (PEHE)  |              | ACIC (AUUC)  |              | IHDP (PEHE)  |              | IHDP (AUUC)  |              |
|-------------------------------------|--------------|--------------|--------------|--------------|--------------|--------------|--------------|--------------|
|                                     | In-Sample    | Out-Sample   | In-Sample    | Out-Sample   | In-Sample    | Out-Sample   | In-Sample    | Out-Sample   |
| OLS [2]                             | 3.749        | 4.340        | 0.843        | 0.496        | 3.856        | 5.674        | 0.652        | 0.492        |
| TARNet [88]                         | 3.236        | 3.254        | <b>0.886</b> | 0.662        | 0.749        | 1.788        | 0.654        | 0.711        |
| PSM [78]                            | 5.228        | 5.094        | 0.884        | 0.745        | 3.219        | 4.634        | 0.740        | 0.681        |
| CFR-WASS [88]                       | 3.128        | 3.207        | 0.873        | 0.669        | 0.657        | 1.704        | 0.656        | 0.715        |
| ESCFR [96]                          | 2.252        | 2.316        | 0.796        | 0.754        | 0.502        | 1.282        | 0.665        | 0.719        |
| ESCFR + UOT(ETM-Refine + MROT-Ent)  | 2.327        | 2.261        | 0.839        | 0.814        | 0.497        | 1.275        | 0.769        | 0.763        |
| ESCFR + UOT(ETM-Refine + MROT-Norm) | <b>2.104</b> | <b>2.216</b> | 0.883        | <b>0.839</b> | <b>0.475</b> | <b>1.146</b> | <b>0.798</b> | <b>0.802</b> |

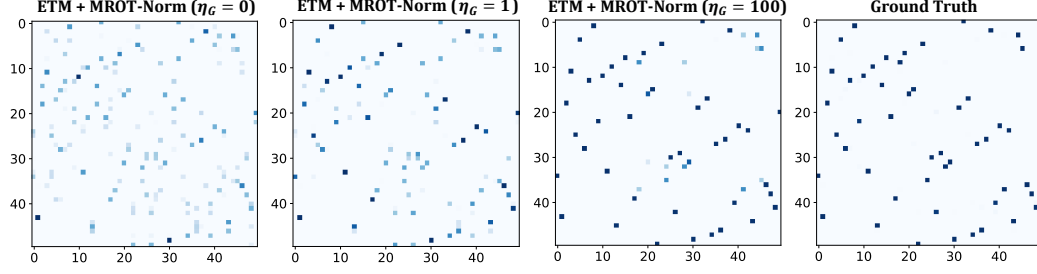

Figure 6: The matching results on ETM + MROT-Norm on SemiUOT with different values of  $\eta_G = \{0, 1, 100\}$ .

We adopt the same experimental settings as UniOT [16]. We utilize the commonly-used H-score [34] to validate the final results as shown in Table 5-6. Note that UniOT + UOT(ETM + MROT) only replaces the entropic UOT in UniOT with our proposed ETM-Refine method with MROT. From that, we can observe that UniOT + UOT(ETM-Refine + MROT-Norm) reaches the best performance, indicating that UOT with ETM + MROT can provide more accurate matching results. Moreover, we adopt T-SNE method [93] to plot the source and target data features in the latent space as shown in Fig.5(a)-(b). We can find that: (1) original UniOT could lead to rather scattered features in the latent space. That is because UniOT with entropic UOT could lead to dense and inaccurate matching solutions, which limits the model potentials. (2) Our proposed UniOT + UOT(ETM + MROT-Norm) can provide more compact features since it provides more accurate solutions. Thus it further illustrates the efficacy of our proposed ETM-Refine with MROT-Norm method.

## L Experiments on Treatment Effect Estimation

**Datasets for Treatment Effect Estimation.** We further conduct ETM-Refine on treatment effect estimation with two semi-synthetic datasets IHDP [88] and ACIC [99]. IHDP is set to estimate the effect of specialist home visits on infants' potential cognitive scores and it contains 747 observations and 25 covariates. ACIC includes 4802 observations and 58 covariates, which comes from the collaborative perinatal project.

**Results.** We involve the following models as baselines: (1) **OLS** [2] utilizes least square regression with treatment as covariates, (2) **TARNet** [88] adopts integral probability metrics for adaptation, (3) **PSM** [78] adopts propensity score for causal effects, (4) **CFR-WASS** [78] utilizes standard optimal transport for adaptation, (5) **ESCFR** [96] further utilizes unbalanced optimal transport for adaptation. We adopt the same experimental settings as ESCFR [96]. We utilize Precision in Estimation of Heterogeneous Effect (PEHE) [88] and Area Under the Uplift Curve (AUUC) [7] for the evaluation. Note that ESCFR + UOT(ETM-Refine + MROT-Ent) only replaces the entropic UOT in ESCFR with our proposed approximate-to-exact ETM-Refine + MROT-Norm. The experimental results are shown in Table 7. From that, we can observe that ESCFR + UOT(ETM-Refine + MROT-Norm) achieves the best performance, indicating the efficacy of our proposed ETM-Refine method.

## M More Experimental Results

**Parameter sensitivity.** We tune  $\eta_G$  on SemiUOT via ETM-Refine with MROT-Norm in range of  $\eta_G \in \{0, 1, 100\}$  using the same data samples shown in Fig.1 and show the results in Fig.6. We can observe that when  $\eta_G$  is smaller (e.g.,  $\eta_G = 0$  or  $\eta_G = 1$ ), the proposed KKT-multiplier regularization term  $\mathcal{G}(\pi, s) = \langle \pi, s \rangle$  may struggle to play a significant role during the optimization process. Meanwhile when  $\eta_G = 100$ , ETM-Refine with MROT-Norm can achieve more accurate

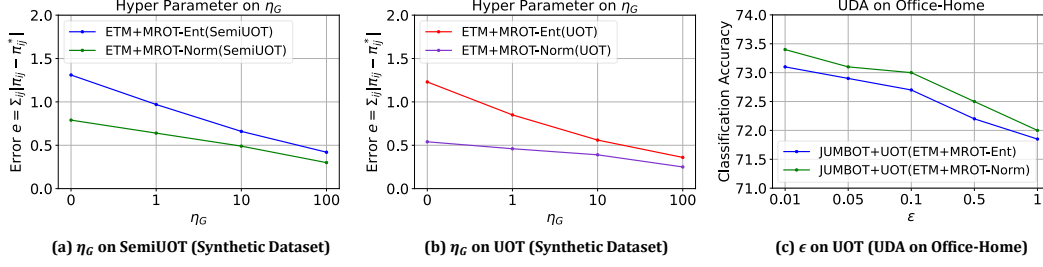

Figure 7: The hyper parameters on  $\eta_G$  and  $\epsilon$ .

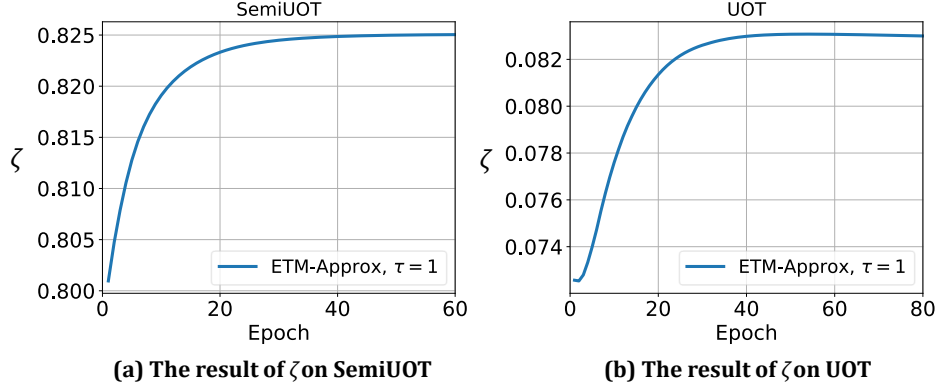

Figure 8: The results of  $\zeta$  and  $L_P$  on UOT and SemiUOT.

1144 matching results. We can conclude that choosing a larger value of  $\eta_G$  can fully utilize the knowledge  
 1145 provided by KKT multiplier and enhance the final results. Moreover, we conduct the experiments  
 1146 for the absolute error when  $\tau = 1$  with  $N = 500$  synthetic data samples on both SemiUOT and  
 1147 UOT and report the results in Fig.7(a)-(b). Larger value on  $\eta_G$  can provide more useful KKT-  
 1148 multiplier information and boost the model performance and therefore we set  $\eta_G = 100$  empirically.  
 1149 Furthermore, we conduct the hyper parameter experiments by varying  $\epsilon = \{0.01, 0.05, 0.1, 0.5, 1\}$   
 1150 on UDA task in Office-Home and report the results in Fig.7(c). We can observe that smaller value of  
 1151  $\epsilon$  can provide a more accurate approximation with higher accuracy and thus we set  $\epsilon = 0.01$ .

## 1152 N Miscellaneous Discussions

### 1153 N.1 The role of $\zeta$ in ETM-based method

1154 We first discuss why we should involve translation invariant  $\zeta$  in both  $L_U$  and  $L_P$ . Specifically, we  
 1155 first analyze the case of SemiUOT. The Fenchel-Lagrange conjugate form of SemiUOT without  
 1156 translation invariant mechanism is given as:

$$\min_{f, g, \zeta} \left[ \tau \sum_{i=1}^M a_i \exp \left( -\frac{f_i}{\tau} \right) - \sum_{j=1}^N b_j g_j \right] \quad (62)$$

$$s.t. \quad f_i + g_j \leq C_{ij}.$$

1157 We can adopt  $c$ -transform on Eq.(62) to obtain the unconstrained optimization problem as:

$$\min_{\tilde{f}} \tilde{L}_P = \tau \sum_{i=1}^M a_i \exp \left( -\frac{f_i}{\tau} \right) - \sum_{j=1}^N \inf_{k \in [M]} [C_{kj} - f_k] b_j, \quad (63)$$

1158 We adopt L-BFGS to optimize  $\tilde{L}_P$  using the same data samples as shown in Fig.1 with  $\tau = 1$ .  
 1159 Meanwhile, the translation invariant term  $\zeta$  in SemiUOT should be calculated as follows:

$$\zeta = \tau \log \left( \sum_{i=1}^M a_i \exp \left( -\frac{f_i}{\tau} \right) \right) - \tau \log \left( \sum_{j=1}^N b_j \right). \quad (64)$$

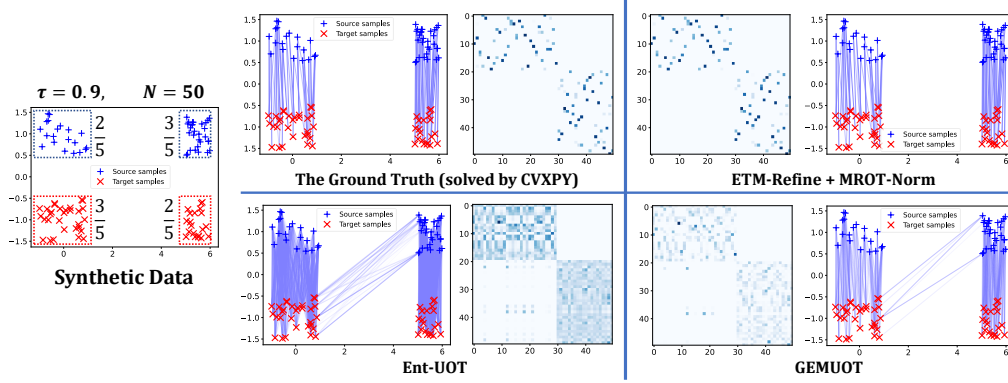

Figure 9: The UOT matching results on class imbalanced case. The blue ‘+’ and red ‘x’ denote the source and target samples, respectively.

1160 Ideally,  $\zeta$  should equals to 0 since  $\sum_{i=1}^M a_i \exp\left(-\frac{f_i}{\tau}\right) = \sum_{j=1}^N b_j$ . However, we can observe that  
 1161  $\zeta > 0$  during the iteration epoch on optimizing  $\tilde{L}_P$  as shown in Fig.8(a). Therefore we can conclude  
 1162 that  $\zeta$  is indispensable during the calculation on SemiUOT. Likewise, the Fenchel-Lagrange conjugate  
 1163 form of UOT without translation invariant mechanism is given as:

$$\min_{\mathbf{v}, \mathbf{u}} \left[ \tau_a \left\langle \mathbf{a}, \exp\left(-\frac{\mathbf{u}}{\tau_a}\right) \right\rangle + \tau_b \left\langle \mathbf{b}, \exp\left(-\frac{\mathbf{v}}{\tau_b}\right) \right\rangle \right] \quad s.t. \quad u_i + v_j \leq C_{ij}. \quad (65)$$

1164 Here we can adopt  $c$ -transform on Eq.(65) to obtain the unconstrained optimization problem as:

$$\min_{\mathbf{u}} \tilde{L}_U = \tau_a \sum_{i=1}^M a_i \exp\left(-\frac{u_i}{\tau_a}\right) + \tau_b \sum_{j=1}^N b_j \exp\left(\frac{\sup_{k=1}^M (u_k - C_{kj})}{\tau_b}\right). \quad (66)$$

1165 We also adopt L-BFGS to optimize  $\tilde{L}_U$  using the same data samples as shown in Fig.2 with  $\tau_a =$   
 1166  $\tau_b = 1$ . Meanwhile, the translation invariant term  $\zeta$  in UOT should be calculated as follows:

$$\zeta = \frac{\tau_a \tau_b}{\tau_a + \tau_b} \left[ \log \left\langle \mathbf{a}, \exp\left(-\frac{\mathbf{u}}{\tau_a}\right) \right\rangle - \log \left\langle \mathbf{b}, \exp\left(-\frac{\mathbf{v}}{\tau_b}\right) \right\rangle \right]. \quad (67)$$

1167 Ideally,  $\zeta$  should equals to 0 since  $\left\langle \mathbf{a}, \exp\left(-\frac{\mathbf{u}}{\tau_a}\right) \right\rangle = \left\langle \mathbf{b}, \exp\left(-\frac{\mathbf{v}}{\tau_b}\right) \right\rangle$ . However, we can observe  
 1168 that  $\zeta > 0$  during the iteration epoch on optimizing  $\tilde{L}_U$  as shown in Fig.8(b). Therefore we can  
 1169 conclude that  $\zeta$  is indispensable during the calculation on UOT. In conclusion, the concept of  
 1170 translation invariant was first proposed in [87]. However, [87] only utilizes translation invariant  
 1171 for entropic UOT. **We highlight that, in this paper, we further extend translation invariant for**  
 1172 **standard UOT/SemiUOT scenario.** We illustrate that translation invariant is essential in solving  
 1173 UOT and SemiUOT problems.

## 1174 N.2 UOT investigation on class imbalanced case

1175 We also conduct the experiments for UOT on the class imbalanced scenario following the settings  
 1176 in [28]. Specifically, the source and target data distributions (Gaussian mixtures of two uniform  
 1177 distributions with different weights) are defined as  $P_X = \frac{2}{5}U([-1, 1] \times [0.5, 1.5]) + \frac{3}{5}U([5, 6] \times$   
 1178  $[0.5, 1.5])$  and  $P_Z = \frac{3}{5}U([-1, 1] \times [-0.5, -1.5]) + \frac{2}{5}U([5, 6] \times [-0.5, -1.5])$ . We first sample  
 1179  $N = 50$  data for both  $P_X$  and  $P_Z$  with  $\tau = 0.9$  and conduct the UOT experiments shown in Fig.9.  
 1180 Note that data No.1–No.20 in  $P_X$  are sampled from  $U([-1, 1] \times [0.5, 1.5])$ , and No.21–No.50 data  
 1181 in  $P_X$  are sampled from  $U([5, 6] \times [0.5, 1.5])$ . Meanwhile, No.1–No.30 data in  $P_Z$  are sampled from  
 1182  $U([-1, 1] \times [-0.5, -1.5])$ , and No.31–No.50 data in  $P_Z$  are sampled from  $U([5, 6] \times [-0.5, -1.5])$   
 1183 to setup the synthetic data experiment. From that we can observe: (1) Ent-UOT could only provide  
 1184 coarse and inaccurate matching results. Moreover, Ent-UOT may lead to mismatch when  $\tau = 0.9$ . (2)  
 1185 GEMUOT with square norm regularization term can obtain more sparse matching results. However,  
 1186 the output results of GEMUOT are still far away from the ground truth. (3) Our proposed ETM-Refine  
 1187 + MROT-Norm can achieve more accurate results while avoiding mismatch compared with Ent-UOT  
 1188 and GEMUOT, which indicates the efficacy of the proposed method.
